# Supplementary material for: Mechanically Robust Silane-Engineered Aerogels for High-Affinity CO₂ Chemisorption under Low-Pressure, High-Temperature Conditions
Source: Research Square preprint supplement (doi:10.21203/rs.3.rs-8197235/v1), 2025-12-02
Supplement: Supplementary file 1 [file 648fa757578f27a1e45c3de5.docx]

## Mechanically Robust Silane-Engineered Aerogels for High-Affinity CO2 Chemisorption under Low-Pressure, High-Temperature Conditions

Authors: Wenyu He1,2,3, Zhipeng Ren1,2,3, Ting Wang1,2,3, Fan Zhang1,2,3, Kyung Hoon Min4, Byeongseok Kim4, Sang Eun Shim4, Denian Li2,3, Yingjie Qian2,3,*, Haoran Yuan2,3,*, Yong Chen2,3

* Corresponding authors.

## Affiliations

- 1 School of Energy Science and Engineering, University of Science and Technology of China, Hefei, Anhui 230026, PR China.
- 2 Guangzhou Institute of Energy Conversion, Chinese Academy of Sciences (CAS), Guangzhou, Guangdong 510640, PR China.
- 3 Guangdong Provincial Key Laboratory of High-Quality Recycling of End-of-Life New Energy Devices, Guangzhou, Guangdong 510640, PR China.
- 4 Department of Chemistry and Chemical Engineering, Education and Research Center for Smart Energy and Materials, Inha University, Incheon 22212, South Korea.

## Corresponding authors

Dr. Yingjie Qian
Guangzhou Institute of Energy Conversion, Chinese Academy of Sciences (CAS), Guangzhou, Guangdong 510640, PR China.
E-mail: qianyj@ms.giec.ac.cn

Dr. Haoran Yuan
Guangzhou Institute of Energy Conversion, Chinese Academy of Sciences (CAS), Guangzhou, Guangdong 510640, PR China.
E-mail: yuanhaoran81@163.com


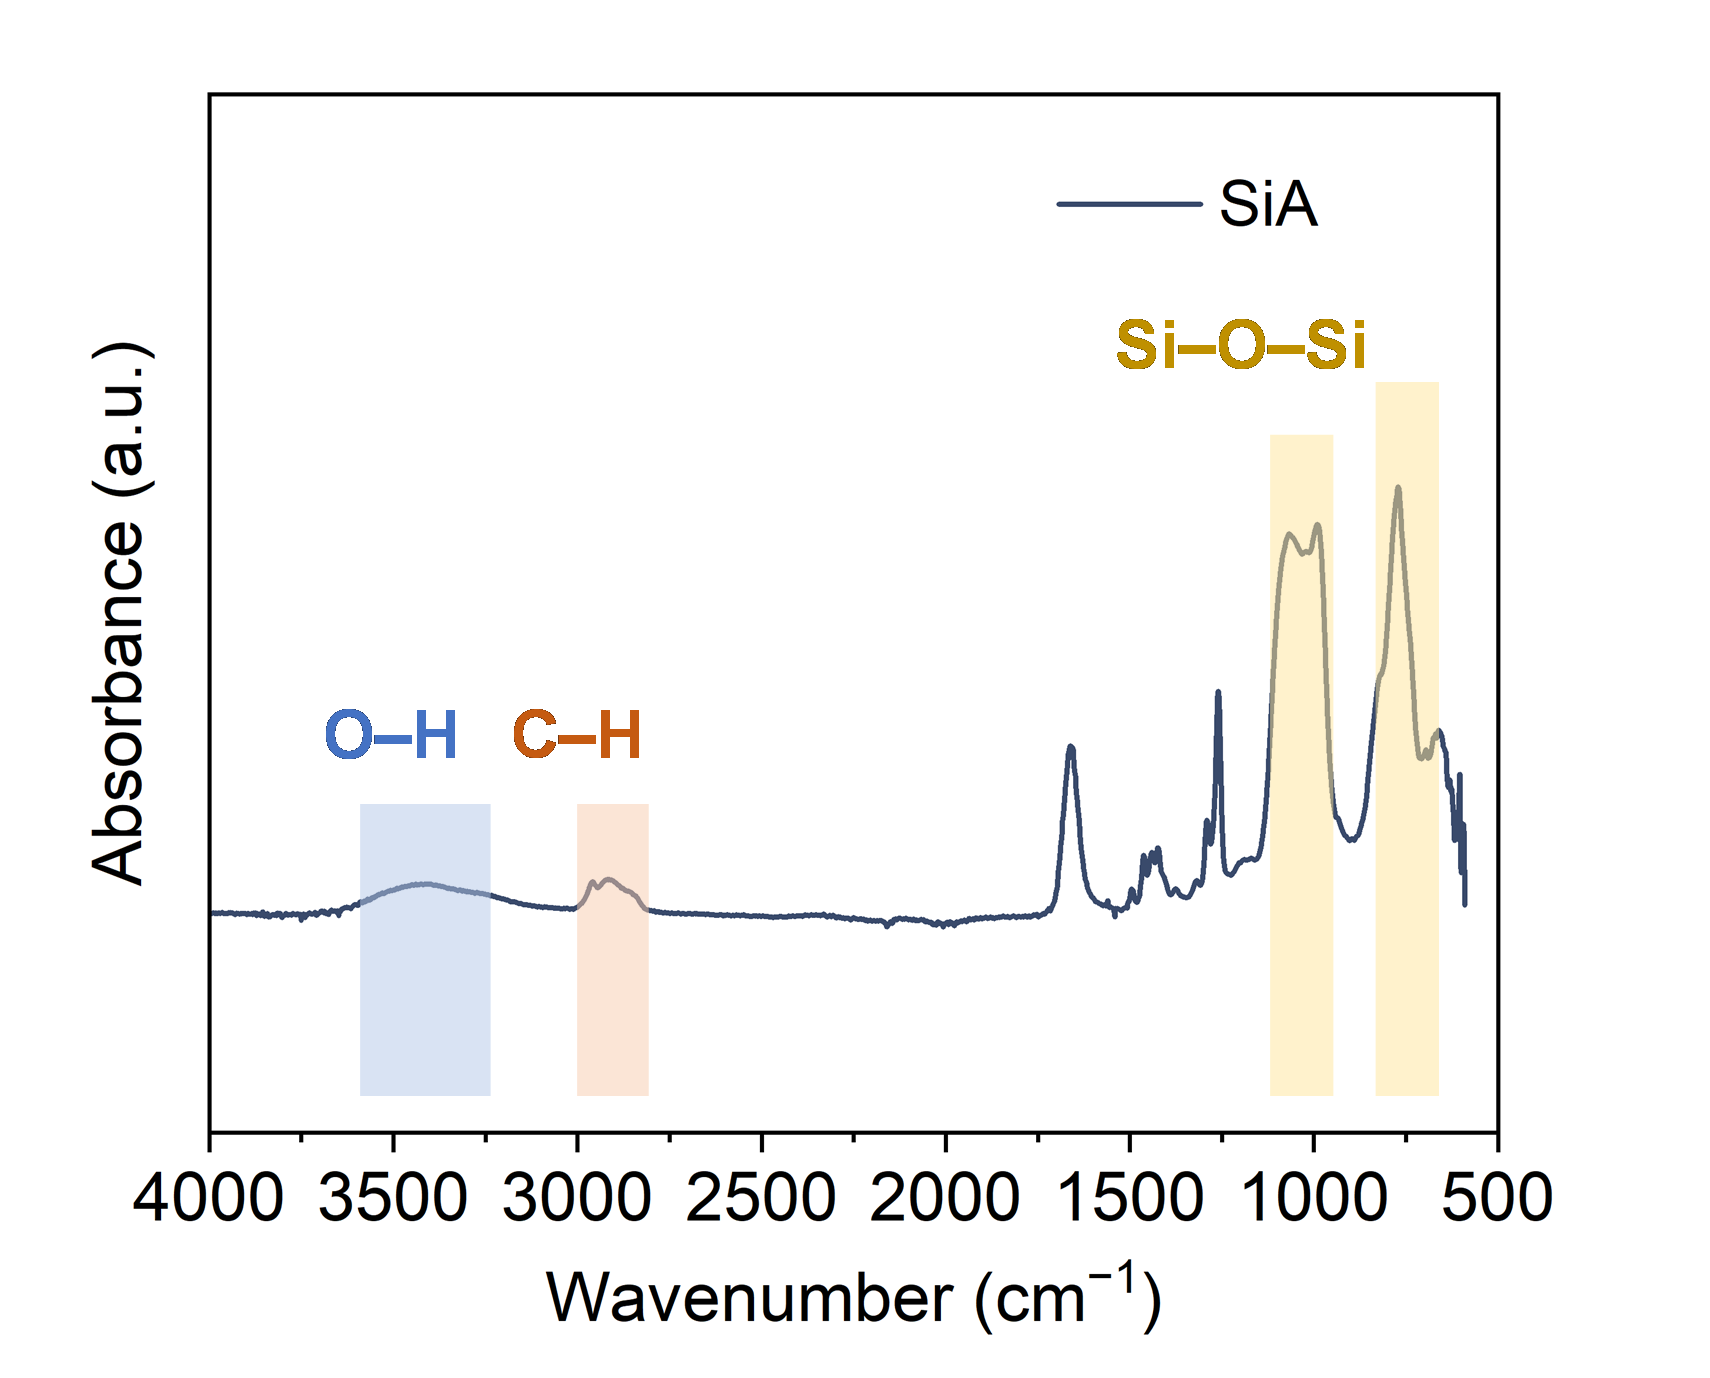


Fig. S1. ATR-FTIR spectrum of the pristine silica–polymer aerogel (SiA). The bands associated with surface silanols (O–H stretching), alkyl chains (C–H stretching).


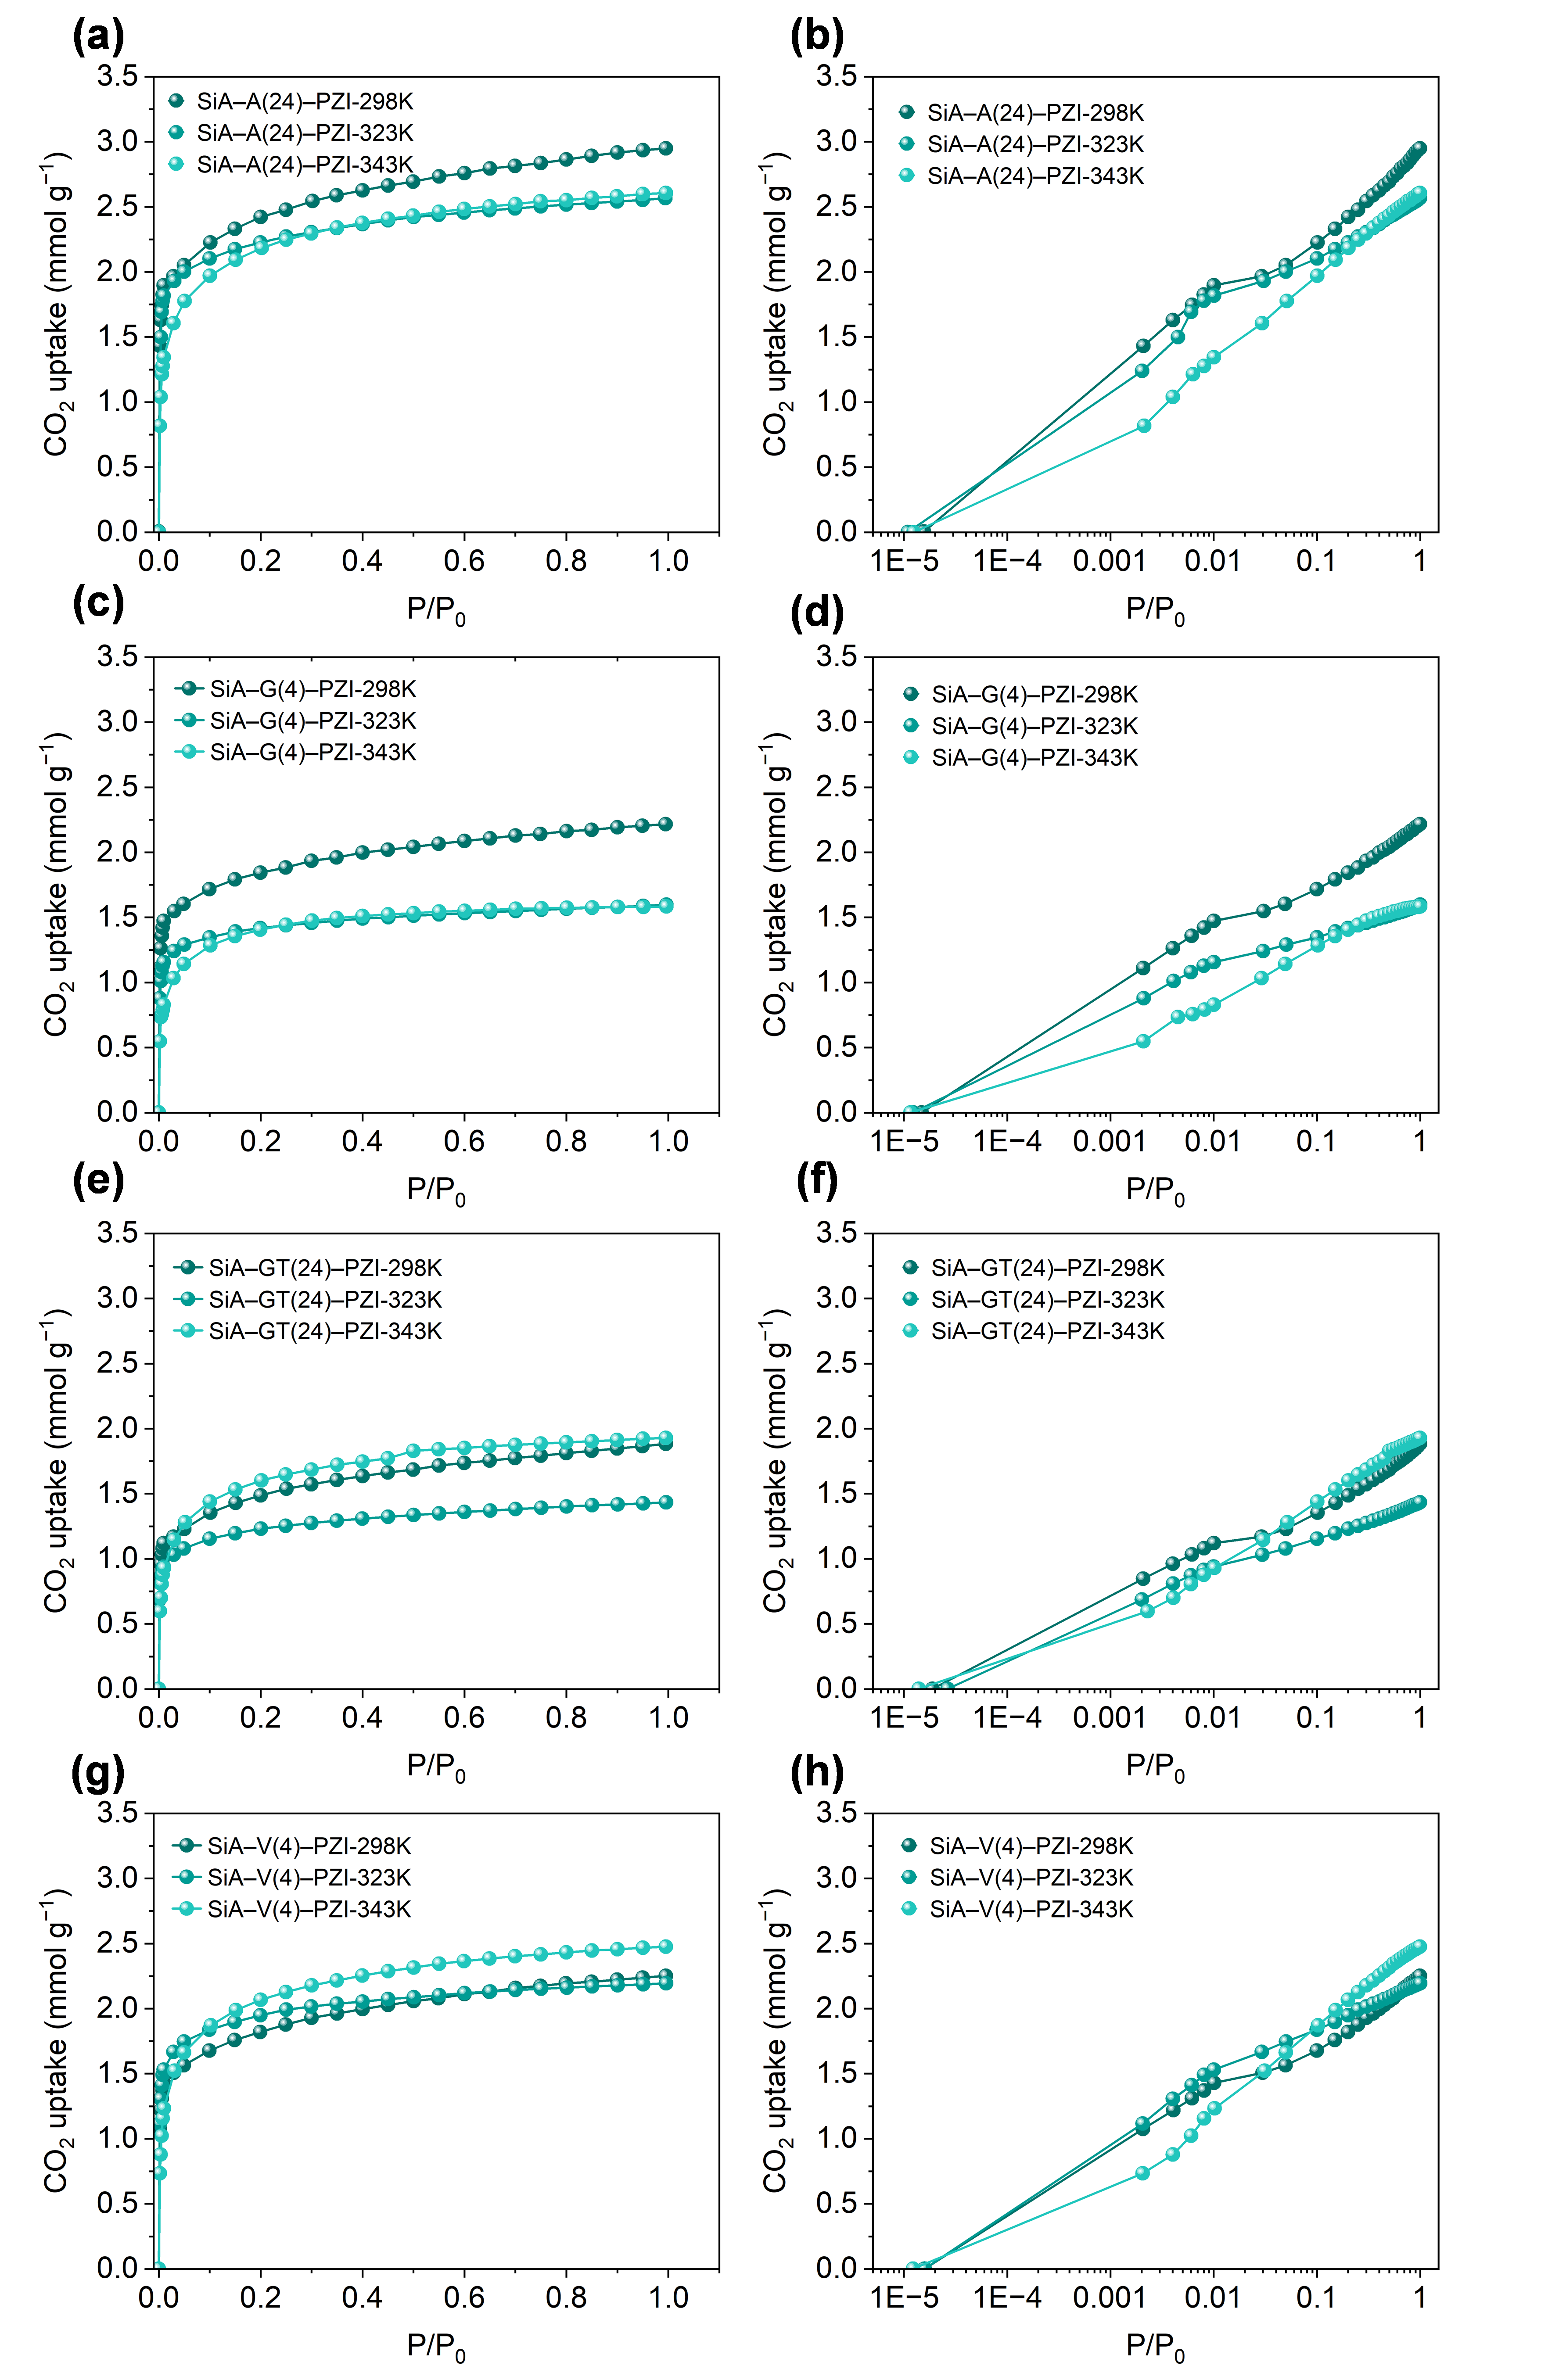


Fig. S2. CO2 adsorption isotherms of representative silanized aerogels at 298, 323, and 343 K. The isotherms illustrate the temperature dependence of CO2 uptake for SiA–X(t)–PZI sorbents (X = A, G, GT, V; see legend for specific samples).

Table S1. Textural parameters of pristine and silanized aerogels SiA–X(t) (X = A, G, GT, V; t = organosilane CVD time). Micropore surface area, mesopore surface area, specific surface area, total pore volume, and average pore size were obtained from N2 adsorption analysis (see Experimental Section).

| Samples | Micropores surface area  (m2 g−1) | Mesopores surface area  (m2 g−1) | Specific surface area  (m2 g−1) | Total pore volume  (cc g−1) | Average Pore Size  (nm) |
| --- | --- | --- | --- | --- | --- |
| SiA | 150.08 | 549.36 | 699.44 | 1.235 | 7.06 |
| SiA–A(4) | 169.02 | 417.04 | 586.06 | 1.087 | 7.42 |
| SiA–A(14) | 88.01 | 202.44 | 290.45 | 0.706 | 9.72 |
| SiA–A(24) | 69.42 | 138.53 | 207.95 | 0.892 | 17.16 |
| SiA–G(4) | 311.43 | 522.72 | 834.15 | 2.094 | 10.04 |
| SiA–G(14) | 233.91 | 360.20 | 594.11 | 1.877 | 12.64 |
| SiA–G(24) | 215.26 | 368.23 | 583.49 | 1.396 | 9.57 |
| SiA–GT(4) | 272.41 | 611.66 | 884.07 | 1.392 | 6.30 |
| SiA–GT(14) | 215.40 | 422.41 | 637.81 | 1.963 | 12.31 |
| SiA–GT(24) | 143.55 | 358.38 | 501.93 | 0.897 | 7.15 |
| SiA–V(4) | 226.43 | 260.09 | 486.52 | 1.117 | 9.18 |
| SiA–V(14) | 155.14 | 271.96 | 427.10 | 0.762 | 7.13 |
| SiA–V(24) | 112.45 | 119.28 | 231.73 | 0.653 | 11.27 |

Table S2. Comparison of BET surface area and compressive strength for representative aerogels reported in the literature and for the present silica–polymer aerogels.

| Aerogels | BET surface area  (m2 g−1) | Compression  Strength  (MPa) | Reference |
| --- | --- | --- | --- |
| Alginate-based aerogels | / | 3.53 | [1] |
| PI-TPUs | 17.19–113.78 | 3.06 | [2] |
| PI-2 | / | 2.41 | [3] |
| SiC aerogels | / | 2.86 | [4] |
| kapok fiber-PPy aerogels | / | 0.12 | [5] |
| CNF/PNIPAm composite aerogels | 44.05 | 0.227 | [6] |
| SMCAs | / | 1.25 | [7] |
| CMP aerogels | 181.00 | 0.54 | [8] |
| TPs-modified lignocellulose aerogels | 36.77 | 0.014 | [9] |
| WTP-PVA Carbon aerogels | 783.00 | 3.50 | [10] |
| SiA | 699.44 | 2.14 | This work |
| SiA–A(4) | 586.06 | 1.98 | This work |
| SiA–A(14) | 290.45 | 1.48 | This work |
| SiA–A(24) | 207.95 | 1.19 | This work |
| SiA–G(4) | 834.15 | 2.60 | This work |
| SiA–G(14) | 594.11 | 2.68 | This work |
| SiA–G(24) | 583.49 | 3.24 | This work |
| SiA–GT(4) | 884.07 | 3.17 | This work |
| SiA–GT(14) | 637.81 | 2.51 | This work |
| SiA–GT(24) | 501.93 | 1.94 | This work |
| SiA–V(4) | 486.52 | 3.50 | This work |
| SiA–V(14) | 427.10 | 3.80 | This work |
| SiA–V(24) | 231.73 | 5.32 | This work |

Table S3. Comparison of CO2 adsorption capacities of various adsorbents under low-pressure conditions. For each material, the adsorption temperature, CO2 partial pressure, and equilibrium uptake are listed.

| Absorbents | Temperature  (K) | Pressure  (mbar) | CO2 uptake  (mmol g−1) | Reference |
| --- | --- | --- | --- | --- |
| HKUST-1 | 298 | 50 | 0.24 | [11] |
| MOF-74(Zn) | 298 | 50 | 0.67 | [12] |
| Bio-MOF-11 | 298 | 50 | 0.48 | [13] |
| ZIF-78 | 298 | 50 | 0.33 | [14] |
| ZIF-8 | 298 | 50 | 0.05 | [15] |
| UiO-66 | 298 | 50 | 0.15 | [16] |
| MOF-808 | 298 | 50 | 0.19 | [17] |
| ILMLs(2.8nm) | 298 | 50 | 0.70 | [17] |
| PVAm(0.7)-HCl@MIL-101 | 298 | 50 | 0.87 | [18] |
| AC800 | 298 | 50 | 1.09 | [19] |
| U67-3AS(2) | 298 | 50 | 0.45 | [20] |
| HCP-MAAM-1 | 298 | 50 | 0.11 | [21] |
| MOF-808-EDTA-TREN(0.3) | 298 | 50 | 0.68 | [22] |
| WSC-500-1 | 298 | 50 | 1.18 | [23] |
| Soot_H2O2(9h)_KOH | 298 | 50 | 0.35 | [24] |
| BBC-KOH | 298 | 50 | 0.84 | [25] |
| CALF-20 | 303 | 50 | 1.75 | [26] |
| MOF-808-DL-Lys | 298 | 50 | 0.72 | [27] |
| SiA–PZI | 298 | 50 | 1.60 | This work |
| SiA–PZI | 298 | 30 | 1.53 | This work |
| SiA–PZI | 298 | 10 | 1.45 | This work |
| SiA–PZI | 323 | 50 | 1.95 | This work |
| SiA–PZI | 323 | 30 | 1.88 | This work |
| SiA–PZI | 323 | 10 | 1.74 | This work |
| SiA–PZI | 343 | 50 | 1.44 | This work |
| SiA–PZI | 343 | 30 | 1.32 | This work |
| SiA–PZI | 343 | 10 | 1.08 | This work |
| SiA–V(4)–PZI | 298 | 50 | 1.56 | This work |
| SiA–V(4)–PZI | 298 | 30 | 1.51 | This work |
| SiA–V(4)–PZI | 298 | 10 | 1.43 | This work |
| SiA–V(4)–PZI | 323 | 50 | 1.75 | This work |
| SiA–V(4)–PZI | 323 | 30 | 1.67 | This work |
| SiA–V(4)–PZI | 323 | 10 | 1.53 | This work |
| SiA–V(4)–PZI | 343 | 50 | 1.66 | This work |
| SiA–V(4)–PZI | 343 | 30 | 1.52 | This work |
| SiA–V(4)–PZI | 343 | 10 | 1.23 | This work |
| SiA–A(24)–PZI | 298 | 50 | 2.05 | This work |
| SiA–A(24)–PZI | 298 | 30 | 1.97 | This work |
| SiA–A(24)–PZI | 298 | 10 | 1.90 | This work |
| SiA–A(24)–PZI | 323 | 50 | 2.00 | This work |
| SiA–A(24)–PZI | 323 | 30 | 1.93 | This work |
| SiA–A(24)–PZI | 323 | 10 | 1.82 | This work |
| SiA–A(24)–PZI | 343 | 50 | 1.78 | This work |
| SiA–A(24)–PZI | 343 | 30 | 1.61 | This work |
| SiA–A(24)–PZI | 343 | 10 | 1.34 | This work |

Table S4. Fitted parameters and regression correlation coefficients (R2) obtained by applying Langmuir, Freundlich, Toth, and Sips isotherm models to the CO2 adsorption data of SiA–PZI, SiA–A(24)–PZI, and SiA–V(4)–PZI at different temperatures.

| Samples | Langmuir model | | | Freundlich model | | | Toth model | | | | Sips model | | | |
| --- | --- | --- | --- | --- | --- | --- | --- | --- | --- | --- | --- | --- | --- | --- |
| qm | B | R2 | K | n | R2 | qm | B | n | R2 | qm | B | n | R2 |
| SiA–PZI-298K | 2.03 | 306 | 0.8952 | 2.25 | 8.08 | 0.9382 | 2.85 | 162810 | 0.23 | 0.9797 | / | / | / | / |
| SiA–PZI-323K | 2.29 | 442 | 0.9418 | 2.51 | 9.65 | 0.8853 | 2.60 | 18588 | 0.35 | 0.9882 | / | / | / | / |
| SiA–PZI-343K | 1.95 | 118 | 0.9578 | 2.15 | 6.07 | 0.9606 | 2.53 | 2023 | 0.34 | 0.9994 | 2.33 | 57 | 0.47 | 0.9983 |
| SiA–A(24)–PZI-298K | 2.67 | 313 | 0.8816 | 2.96 | 8.04 | 0.9355 | 3.82 | 211888 | 0.22 | 0.9740 | 3.43 | 118 | 0.33 | 0.9656 |
| SiA–A(24)–PZI-323K | 2.40 | 372 | 0.9399 | 2.63 | 9.10 | 0.9024 | 2.81 | 22115 | 0.32 | 0.9846 | / | / | / | / |
| SiA–A(24)–PZI-343K | 2.44 | 130 | 0.9377 | 2.71 | 6.13 | 0.9721 | 3.76 | 12339 | 0.25 | 0.9985 | / | / | / | / |
| SiA–V(4)–PZI-298K | 2.04 | 298 | 0.8779 | 2.26 | 7.88 | 0.9394 | 3.02 | 279341 | 0.21 | 0.9738 | / | / | / | / |
| SiA–V(4)–PZI-323K | 2.07 | 373 | 0.9452 | 2.27 | 9.09 | 0.8994 | 2.38 | 13687 | 0.35 | 0.9908 | / | / | / | / |
| SiA–V(4)–PZI-343K | 2.33 | 109 | 0.9452 | 2.59 | 5.80 | 0.9730 | 3.50 | 5134 | 0.27 | 0.9992 | 3.04 | 32 | 0.42 | 0.9980 |

## References

[1] HOU Y, ZHONG X, DING Y, et al. Alginate-based aerogels with double catalytic activity sites and high mechanical strength [J]. Carbohydrate Polymers, 2020, 245: 116490.

[2] ZHAO X, SU M, YU S, et al. Surface modification of polyimide aerogel by thermoplastic polyurethane for enhanced mechanical strength and thermal insulation performance [J]. ACS Applied Materials & Interfaces, 2024, 16(22): 29282-90.

[3] ZHANG T, ZHAO Y, WANG K. Polyimide aerogels cross-linked with aminated Ag Nanowires: Mechanically strong and tough [J]. Polymers, 2017, 9(10): 530.

[4] YAN M, PAN Y, HE P, et al. Mechanically strong SiC aerogels with broadband electromagnetic wave absorption enabled by hollow skeleton and interface engineering [J]. Chem Eng J, 2024, 497: 154556.

[5] MU P, BAI W, FAN Y, et al. Conductive hollow kapok fiber-PPy monolithic aerogels with excellent mechanical robustness for efficient solar steam generation [J]. J Mater Chem A, 2019, 7(16): 9673-9.

[6] ZHANG X, WANG Y, ZHAO J, et al. Mechanically strong and thermally responsive cellulose nanofibers/poly(n-isopropylacrylamide) composite aerogels [J]. ACS Sustainable Chemistry & Engineering, 2016, 4(8): 4321-7.

[7] YAN M, CHENG X, GONG L, et al. Flexible SiC nanowire/mullite fiber composite aerogel with adjustable strength based on micromechanical design [J]. Chem Eng J, 2023, 466: 143089.

[8] MU P, BAI W, ZHANG Z, et al. Robust aerogels based on conjugated microporous polymer nanotubes with exceptional mechanical strength for efficient solar steam generation [J]. J Mater Chem A, 2018, 6(37): 18183-90.

[9] SUN X, YU Q, WANG F, et al. Sustainable lignocellulose aerogel for air purifier with thermal insulation, flame retardancy, mechanical strength, and its life cycle assessment [J]. International Journal of Biological Macromolecules, 2024, 257: 128599.

[10] VAZHAYAL L, WILSON P, PRABHAKARAN K. Waste to wealth: Lightweight, mechanically strong and conductive carbon aerogels from waste tissue paper for electromagnetic shielding and CO2 adsorption [J]. Chem Eng J, 2020, 381: 122628.

[11] MIN WANG Q, SHEN D, BüLOW M, et al. Metallo-organic molecular sieve for gas separation and purification [J]. Microporous and Mesoporous Materials, 2002, 55(2): 217-30.

[12] CASKEY S R, WONG-FOY A G, MATZGER A J. Dramatic tuning of carbon dioxide pptake via metal substitution in a coordination polymer with cylindrical pores [J]. Journal of the American Chemical Society, 2008, 130(33): 10870-1.

[13] AN J, GEIB S J, ROSI N L. High and selective CO2 uptake in a cobalt adeninate metal−organic framework exhibiting pyrimidine- and amino-decorated pores [J]. Journal of the American Chemical Society, 2010, 132(1): 38-9.

[14] BANERJEE R, FURUKAWA H, BRITT D, et al. Control of pore size and functionality in isoreticular zeolitic imidazolate frameworks and their carbon dioxide selective capture properties [J]. Journal of the American Chemical Society, 2009, 131(11): 3875-7.

[15] HUANG H, ZHANG W, LIU D, et al. Effect of temperature on gas adsorption and separation in ZIF-8: A combined experimental and molecular simulation study [J]. Chemical Engineering Science, 2011, 66(23): 6297-305.

[16] ABID H R, TIAN H, ANG H-M, et al. Nanosize Zr-metal organic framework (UiO-66) for hydrogen and carbon dioxide storage [J]. Chem Eng J, 2012, 187: 415-20.

[17] ZHAO M, BAN Y, YANG W. Assembly of ionic liquid molecule layers on metal–organic framework-808 for CO2 capture [J]. Chem Eng J, 2022, 439: 135650.

[18] SHIN S, YOO D K, BAE Y-S, et al. Polyvinylamine-loaded metal–organic framework MIL-101 for effective and selective CO2 adsorption under atmospheric or lower pressure [J]. Chem Eng J, 2020, 389: 123429.

[19] LI D, ZHOU J, ZHANG Z, et al. Improving low-pressure CO2 capture performance of N-doped active carbons by adjusting flow rate of protective gas during alkali activation [J]. Carbon, 2017, 114: 496-503.

[20] YOO D K, JHUNG S H. Selective CO2 adsorption at low pressure with a Zr-based UiO-67 metal–organic framework functionalized with aminosilanes [J]. J Mater Chem A, 2022, 10(16): 8856-65.

[21] FAYEMIWO K A, VLADISAVLJEVIĆ G T, NABAVI S A, et al. Nitrogen-rich hyper-crosslinked polymers for low-pressure CO2 capture [J]. Chem Eng J, 2018, 334: 2004-13.

[22] NAM H Y, LEE G, JHUNG S H. Selective CO2 adsorption over a Zr-based metal–organic framework functionalized with tris(2-aminoethyl)amine [J]. Chem Eng J, 2024, 494: 153072.

[23] RAO L, LIU S, WANG L, et al. N-doped porous carbons from low-temperature and single-step sodium amide activation of carbonized water chestnut shell with excellent CO2 capture performance [J]. Chem Eng J, 2019, 359: 428-35.

[24] GUERRERO PEñA G D J, REDDY K S K, VARGHESE A M, et al. Carbon dioxide adsorbents from flame-made diesel soot nanoparticles [J]. Science of The Total Environment, 2023, 859: 160140.

[25] JI Y, ZHANG C, ZHANG X J, et al. A high adsorption capacity bamboo biochar for CO2 capture for low temperature heat utilization [J]. Separation and Purification Technology, 2022, 293: 121131.

[26] LIN J-B, NGUYEN T T T, VAIDHYANATHAN R, et al. A scalable metal-organic framework as a durable physisorbent for carbon dioxide capture [J]. Science, 2021, 374(6574): 1464-9.

[27] LYU H, CHEN O I-F, HANIKEL N, et al. Carbon dioxide capture chemistry of amino acid functionalized metal–organic frameworks in humid flue gas [J]. Journal of the American Chemical Society, 2022, 144(5): 2387-96.
